# Supplementary material for: A comparative study on the regulatory region of the PERIOD1 gene among diurnal/nocturnal primates
Source: PubMed Central journal article supplement (PMC5039903; doi:10.1186/s40101-016-0111-9), 2016-09-28

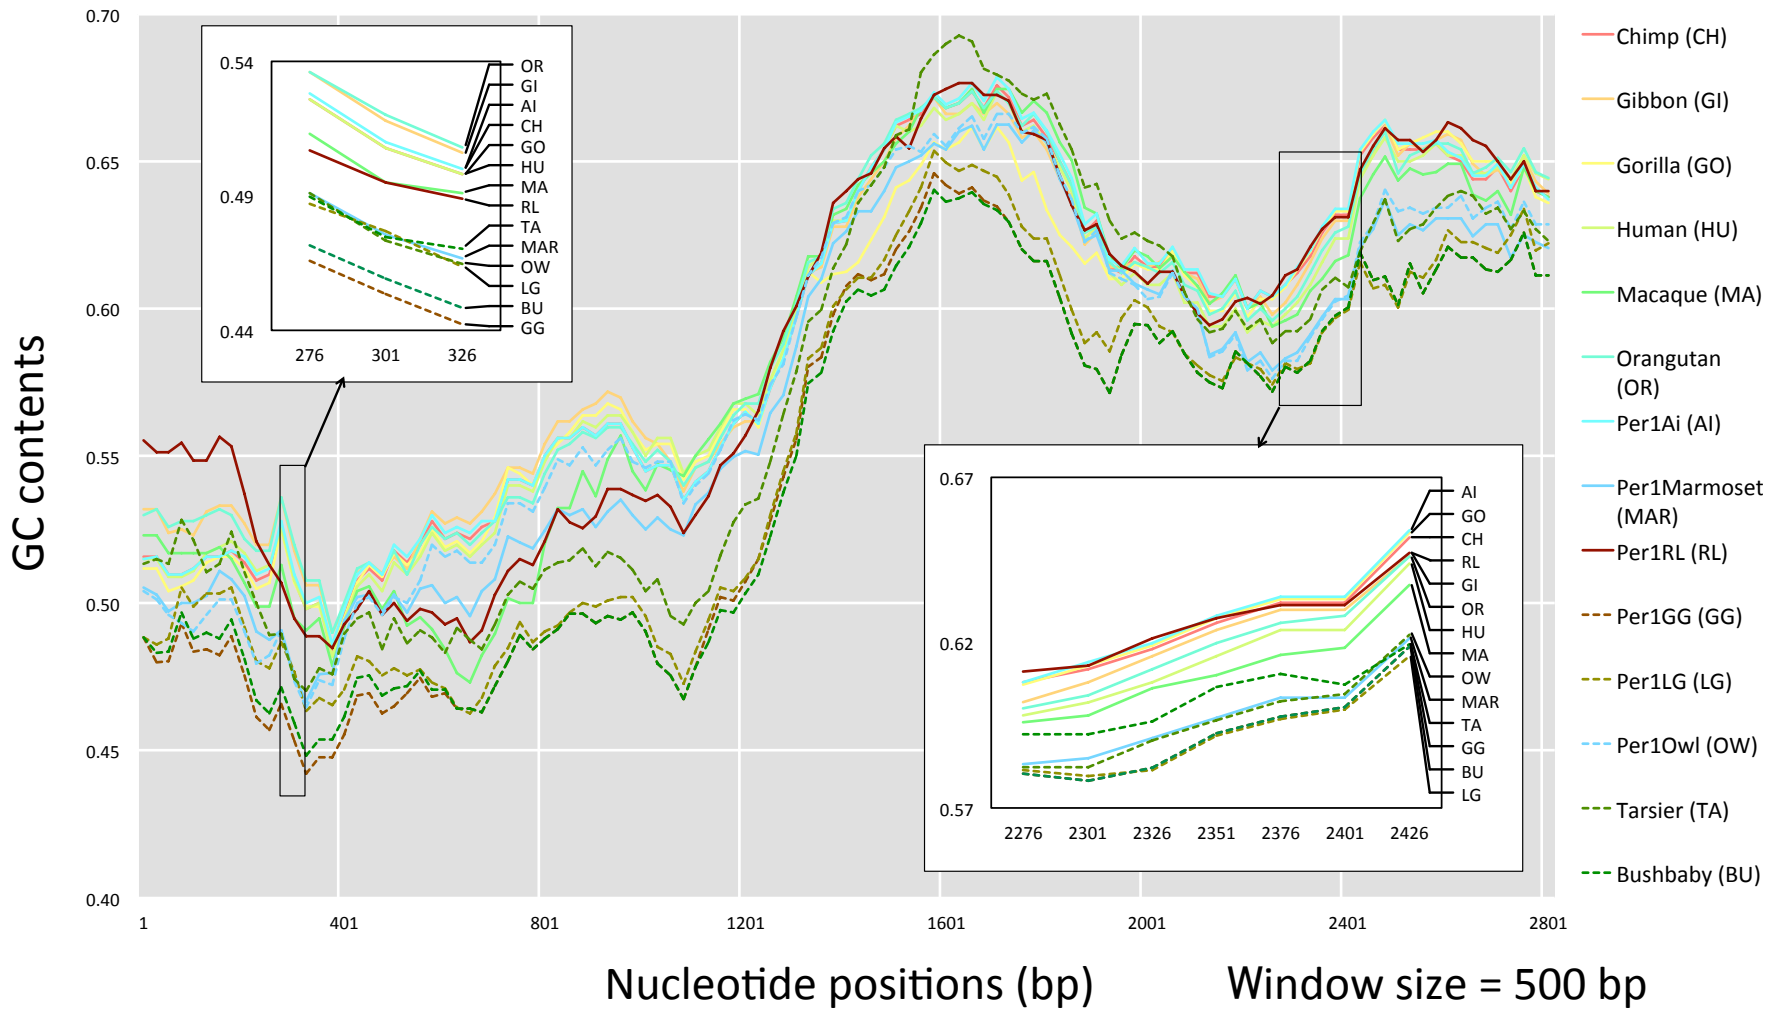

Supplement: 40101_2016_111_MOESM1_ESM.pdf [file 40101_2016_111_MOESM1_ESM.pdf]
